# Supplementary material for: Therapeutic Approaches in Pulmonary Arterial Hypertension with Beneficial Effects on Right Ventricular Function—Preclinical Studies
Source: MDPI journal article supplement (doi:10.3390/ijms242115539), 2023-10-24
Supplement: s1 [file s1]

**Table S1.** Other results.

| Study | Drug(s)              | RVEF |   |   |        | mPAP |   |   |   | RV/BW |   |   |   | RV weight |   |   |   | RV/TL |   |   |   |
|-------|----------------------|------|---|---|--------|------|---|---|---|-------|---|---|---|-----------|---|---|---|-------|---|---|---|
|       |                      | C    | M | S | P      | C    | M | S | P | C     | M | S | P | C         | M | S | P | C     | M | S | P |
| 1     | Urocortin-2          |      | ↑ |   | ↑<br>* |      |   |   |   |       |   |   |   |           |   |   |   |       |   |   |   |
| 2     | Sacubitril/valsartan |      |   | ↔ | ↔      |      |   |   |   |       |   | ↓ | ↔ |           |   |   |   |       |   |   |   |
| 3     | GS-444217            |      | ↑ |   |        |      | ↓ | ↓ |   |       |   |   |   |           |   |   |   |       |   | ↓ |   |
| 4     | Sodium valproate     |      |   |   |        |      |   |   |   |       | ↓ |   | ↓ |           |   |   |   |       |   |   |   |
| 5     | Ivabradine           |      |   |   |        |      |   |   |   |       |   |   |   |           |   |   |   |       |   |   |   |
| 6     | Sunitinib            |      |   |   |        |      |   |   |   |       |   |   |   |           |   |   |   |       |   |   |   |
| 6     | Sorafenib            |      |   |   |        |      |   |   |   |       |   |   |   |           |   |   |   |       |   |   |   |
| 7     | Juglone              |      |   |   |        |      | ↓ |   |   |       |   |   |   |           |   |   | ↔ |       |   |   |   |
| 8     | Celastrol            |      |   |   |        |      |   |   |   |       |   |   |   |           |   |   |   |       |   |   |   |
| 9     | Dapagliflozin        |      |   |   |        |      |   |   |   |       |   |   |   |           |   |   |   |       |   |   |   |
| 10    | Macitentan           |      |   |   |        |      |   |   |   |       |   |   |   |           |   |   |   |       |   |   |   |
| 10    | Tadalafil            |      |   |   |        |      |   |   |   |       |   |   |   |           |   |   |   |       |   |   |   |
| 10    | Mac. + Tad.          |      |   |   |        |      |   |   |   |       |   |   |   |           |   |   |   |       |   |   |   |
| 11    | Neuregulin-1         |      | ↑ |   |        |      |   |   |   |       |   |   |   |           |   |   |   |       |   | ↓ |   |
| 12    | GapmeR H19           |      |   |   |        |      |   |   |   |       |   |   |   |           |   |   |   |       |   |   |   |
| 13    | MitoQ                |      |   |   |        |      |   |   |   |       |   |   |   |           |   |   |   |       |   |   |   |
| 14    | Dichloroacetate      |      |   |   |        |      |   |   |   |       |   |   |   |           |   |   |   |       |   |   |   |
| 15    | Gallein              |      |   |   |        |      |   |   |   |       |   |   |   |           |   |   |   |       |   |   |   |
| 16    | Sildenafil           |      |   |   |        |      |   |   |   |       |   |   |   |           | ↓ |   | ↔ |       |   |   |   |
| 17    | Clorgyline           |      |   |   |        |      |   |   |   |       |   |   |   |           |   |   |   |       |   |   |   |
| 18    | Dantrolene           |      |   |   |        |      |   |   |   |       | ↓ |   |   |           |   |   |   |       |   |   |   |
| 19    | RVX208               |      |   |   |        |      | ↓ | ↔ |   |       |   |   |   |           |   |   |   |       |   |   |   |

mPAP: mean pulmonary arterial pressure; RV: right ventricle; RV/BW: right ventricle weight/bodyweight; RVEF: right-ventricular ejection fraction; RV/TL: right ventricle weight/ tibial length; C: chronic hypoxia; M: monocrotaline (with or without shunt); S: Sugen 5416/hypoxia; P: pulmonary artery banding

↓ - significant decrease in the parameter

↑ - significant increase in the parameter

↔ - no significant effect in the parameter

\* - in the animal model, the parameter did not significantly change

**Table S2.** Other results.

| Stud<br>y | Drug(s)              | SV |   |   |   | TIMP-1 |   |   |   | Treadmill<br>distance |   |   |        | RVWT |   |   |   | RV FAC |   |   |   |
|-----------|----------------------|----|---|---|---|--------|---|---|---|-----------------------|---|---|--------|------|---|---|---|--------|---|---|---|
|           |                      | C  | M | S | P | C      | M | S | P | C                     | M | S | P      | C    | M | S | P | C      | M | S | P |
| 1         | Urocortin-2          |    |   |   |   |        |   |   |   |                       | ↑ |   |        |      |   |   |   |        |   |   |   |
| 2         | Sacubitril/valsartan |    |   | ↔ | ↔ |        |   |   |   |                       |   |   |        |      |   |   |   |        |   |   |   |
| 3         | GS-444217            |    |   |   |   |        | ↓ | ↓ |   |                       |   |   |        |      |   |   |   |        |   |   |   |
| 4         | Sodium valproate     |    |   |   |   |        |   |   |   |                       |   |   |        |      | ↓ |   | ↓ |        |   |   |   |
| 5         | Ivabradine           |    | ↑ | ↑ | ↑ |        |   |   |   |                       | ↑ | ↔ | ↑<br>* |      |   |   |   |        | ↔ | ↑ | ↑ |
| 6         | Sunitinib            |    |   |   |   |        |   |   |   |                       |   |   |        |      | ↓ |   | ↓ |        |   |   |   |
| 6         | Sorafenib            |    |   |   |   |        |   |   |   |                       |   |   |        |      | ↓ |   | ↓ |        |   |   |   |
| 7         | Juglone              |    |   |   |   |        |   |   |   |                       |   |   |        |      |   |   |   |        |   |   |   |
| 8         | Celastrol            |    |   |   |   |        |   |   |   |                       |   | ↑ |        |      |   |   | ↓ |        |   | ↑ | ↑ |
| 9         | Dapagliflozine       |    |   |   |   |        |   |   |   |                       |   |   |        |      |   |   |   |        |   |   |   |
| 10        | Macitentan           |    |   |   |   |        |   |   |   |                       |   |   |        |      |   |   | ↔ |        |   |   |   |
| 10        | Tadalafil            |    |   |   |   |        |   |   |   |                       |   |   |        |      |   |   | ↔ |        |   |   |   |
| 10        | Mac. + Tad.          |    |   |   |   |        |   |   |   |                       |   |   |        |      |   |   | ↔ |        |   |   |   |
| 11        | Neuregulin-1         |    |   |   |   |        |   |   |   |                       |   |   |        |      |   |   |   |        |   |   |   |
| 12        | GapmeR H19           |    | ↑ |   | ↑ |        |   |   |   |                       |   |   |        |      |   |   |   |        | ↑ |   | ↑ |
| 13        | MitoQ                |    |   |   |   |        |   |   |   |                       |   |   |        |      | ↓ |   | ↔ |        |   |   |   |
| 14        | Dichloroacetate      |    |   |   |   |        |   |   |   |                       |   |   |        |      |   | ↓ |   |        |   |   |   |
| 15        | Gallein              |    |   |   |   |        |   |   |   |                       | ↔ |   | ↑      |      |   |   |   |        |   |   |   |
| 16        | Sildenafil           |    | ↑ |   | ↔ |        | ↓ |   | ↔ |                       |   |   |        |      |   |   |   |        |   |   |   |
| 17        | Clorgyline           |    |   | ↔ | ↔ |        |   |   |   |                       |   |   |        |      |   |   |   |        |   |   |   |
| 18        | Dantrolene           |    |   |   |   |        |   |   |   |                       |   |   |        |      |   | ↓ |   |        |   |   |   |
| 19        | RVX208               |    |   |   | ↑ |        |   |   |   |                       |   |   |        |      |   |   |   |        |   |   |   |

SV: stroke volume; RVWT: right-ventricular wall thickness; RV FAC: right-ventricular fractional area change; TIMP-1: mRNA expression of tissue inhibitor of metalloproteinase 1; M: monocrotaline (with or without shunt); S: Sugen 5416/hypoxia; P: pulmonary artery banding

↓ - significant decrease in the parameter

↑ - significant increase in the parameter

↔ - no significant effect in the parameter

\* - in the animal model, the parameter did not significantly worsen
